# Supplementary material for: Anthelmintic activity of trans-cinnamaldehyde and A- and B-type proanthocyanidins derived from cinnamon (Cinnamomum verum)
Source: PubMed Central journal article supplement (PMC4588565; doi:10.1038/srep14791), 2015-09-30
Supplement: srep14791-s1.pdf [file srep14791-s1.pdf]

## Supplementary Material:

### Anthelmintic activity of *trans*-cinnamaldehyde and A- and B-type proanthocyanidins derived from cinnamon (*Cinnamomum verum*)

Andrew R. Williams, Aina Ramsay, Tina V.A. Hansen, Honorata M. Ropiak, Helena Mejer, Peter Nejsum, Irene Mueller-Harvey, Stig M. Thamsborg

**Supplementary Table 1:** Composition of flavan-3-ol terminal units of extract and purified fractions of proanthocyanidins (PAC) of cinnamon in relative percentage of total PAC (%) and mg of flavan-3-ols/g DW.

| Cinnamon    | Terminal units |            |             |            |             |            |             |            |           |            |
|-------------|----------------|------------|-------------|------------|-------------|------------|-------------|------------|-----------|------------|
|             | HPLC peak 1    |            | HPLC peak 2 |            | HPLC peak 3 |            | HPLC peak 4 |            | Peak 5    |            |
|             | %              | mg/g       | %           | mg/g       | %           | mg/g       | %           | mg/g       | %         | mg/g       |
| Extract     | 9.5 (0.1)      | 23.0 (0.2) | 1.4 (0.1)   | 3.4 (0.1)  | 8.0 (0.1)   | 19.4 (0.1) | 4.7 (0.1)   | 11.4 (0.1) | 2.2 (0.1) | 5.3 (0.1)  |
| F1-fraction | 13.4 (0.1)     | 70.2 (0.3) | 2.9 (0.1)   | 15.2 (0.1) | 14.3 (0.1)  | 74.9 (0.6) | 7.0 (0.1)   | 36.7 (0.1) | 4.5 (0.1) | 23.6 (0.7) |
| F2-fraction | 6.8 (0.1)      | 37.4 (0.1) | 1.8 (0.1)   | 9.9 (0.1)  | 5.7 (0.2)   | 31.4 (0.1) | 3.1 (0.1)   | 17.1 (0.1) | 1.2 (0.1) | 6.6 (0.1)  |

**Supplementary Table 2:** Composition of flavan-3-ol extension units of extract and purified fractions of proanthocyanidins (PAC) of cinnamon in relative percentage of total PAC (%) and mg of flavan-3-ols/g DW.

| Cinnamon    | Extension units |            |              |            |              |             |              |            |
|-------------|-----------------|------------|--------------|------------|--------------|-------------|--------------|------------|
|             | HPLC peak 8     |            | HPLC peak 10 |            | HPLC peak 11 |             | HPLC peak 12 |            |
|             | %               | mg/g       | %            | mg/g       | %            | mg/g        | %            | mg/g       |
| Extract     | 3.3 (0.1)       | 8.0 (0.1)  | 16.9 (0.3)   | 40.9 (0.4) | 47.9 (0.8)   | 115.9 (0.1) | 6.2 (0.1)    | 15.0 (0.1) |
| F1-fraction | 1.9 (0.1)       | 10.0 (0.1) | 4.0 (0.1)    | 21.0 (0.6) | 39.8 (0.4)   | 208.6 (0.5) | 12.4 (0.1)   | 65.0 (0.1) |
| F2-fraction | 4.6 (0.1)       | 25.3 (0.1) | 4.6 (0.2)    | 25.3 (0.2) | 66.6 (1.1)   | 366.3 (0.1) | 5.5 (0.1)    | 30.3 (0.1) |
